# Supplementary material for: The Modulation of Synoptic Weather Patterns and Human Activities on the Diurnal Cycle of Summertime Canopy Urban Heat Island in Yangtze River Delta Urban Agglomeration, China
Source: Copernicus journal article supplement (doi:10.5194/egusphere-2024-3111), 2024-10-15
Supplement: Supplementary file [file egusphere-2024-3111-AC2-supplement.pdf]

# Response to Review Comments

Dear Reviewer and Editors:

We are sincerely grateful to the editor and reviewer for their valuable time for reviewing our manuscript. The comments are very helpful and valuable, and we have addressed the issues raised by the reviewer in the revised manuscript. Please find our point-by-point response (in blue text) to the comments (in black text) raised by the reviewer. We have revised the paper according to your comments (highlighted in red text of the revised manuscript).

Sincerely yours,

Dr. Yuanjian Yang, representing all co-authors

## **Reviewer #1:**

**The study focuses on the contribution of the canyon urban heat island intensity in the daytime and nighttime by analysing different datasets. The analysis is comprehensive and the whole story is also very organised. However, I have one major comment which suggests the author address.**

**Until now, studies have focused a lot on the mechanism of the canyon UHI, especially the intensity. Many previous studies have also focused on the reason for UHI. The study has two main conclusions: 1) CUHI is larger during nighttime and under the high-pressure system; 2) synoptic weather patterns have a more pronounced influence on day CUHI, but human activities dominated night CUHI. These two points are not new findings; they can be easily found and learnt from the previous literature and even textbooks. Thus, what is the significant contribution of the current work? Indeed, authors applied more advanced and updated analysis methods, yet what are the new findings, which are similar to the previous or different to the previous?**

**I would also suggest the authors reconstruct the abstract and introduction. The current version of the abstract cannot fully reflect significance. In the introduction, authors should highlight the combination of the synoptic and human activities! Similarly, more discussion and explanation should focus on section 3.3 in the results. The analysis and results in the previous sections are a bit lengthy, which makes the focus of the article not sharp enough.**

**Response:** Thanks very much for taking time to provide us with such valuable comments that significantly improve the quality of our manuscript. In line with your comments and suggestions, we have revised our manuscript carefully and prepared a list of point-by-point responses below.

Firstly, I have accordingly refined both the abstract and conclusion sections of our manuscript. Indeed, our conclusions are built upon the foundation of existing knowledge. However, as you pointed out, we have employed more advanced weather classification and data mining techniques, which have enabled us to gain a more nuanced understanding of the formation mechanisms of the diurnal cycle of CUHI. For instance, we have quantified the contributions of SWPs and human activities to the day CUHI and night CUHI, adding depth to the existing literature. Furthermore, our study has uncovered a diurnal asymmetry in the modulation of SWPs and human activities on CUHI, resulting in a significant reduction in the daily amplitude of CUHI. This finding provides a novel perspective for investigating the diurnal cycle and formation mechanisms of the CUHI.

Secondly, I have revised the introduction accordingly, with a particular focus on highlighting the lack of sufficient attention in existing research regarding the combination of SWPs and human activities on the modulation of diurnal cycle of CUHI. Specifically, I have emphasized the gap in understanding the differences in the regulation of daytime and nighttime CUHI by these factors.

Thirdly, thank you very much for your valuable suggestion on streamlining the manuscript. I fully agree that the content prior to section 3.3 was somewhat lengthy, which may have blurred the focus of the article. In response, I have adjusted the overall structure by condensing some discussions and analyses, and have moved some

figures to the appendix to enhance the clarity of the paper's logic.

Lastly, to enhance the organization and facilitate the reviewer's understanding of the manuscript, I have attached a workflow diagram in my response, outlining the datasets and methods utilized in this study.

Thank you once again for your valuable feedback, which has greatly improved the quality of our manuscript.

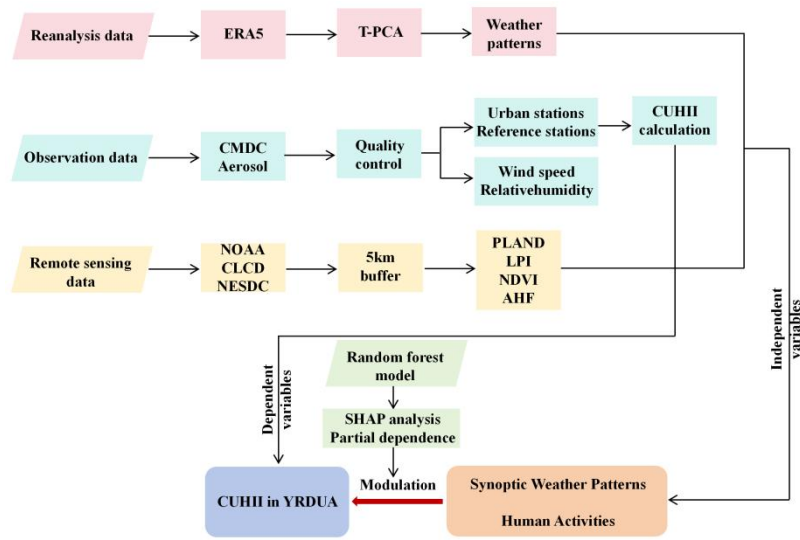

Figure R1: The workflow of the datasets and methods used in this paper.

**Minor comments:**

**1. Line 154, reference format typo.**

**Response:** According to your comments, the reference format typo has been corrected.

I have carefully addressed each of your minor comments and double-checked the entire manuscript for any other potential issues.

**2. Please also indicate the data period and temporal resolution of the ERA5 dataset.**

**Response:** I apologize for the lack of clarity in my previous submission.

To clarify, the data period for the specific subset of the ERA5 dataset used in our study spans the months of June to August from 2011 to 2020. The temporal resolution

of the dataset is hourly, providing a detailed and comprehensive view of weather and climate conditions over this time frame.

**3. Section 2.3.1: More explanation of the calculation of CUHII. There are 43 USs and 27 RSs, for each US, which RS is selected to be linked with to get the CUHII?**

**Response:** Thank you for bringing this clarification to our attention. The method used to calculate CUHII was specifically based on comparing the air temperature differences between USs and RSs during the summertime (Ren et al., 2007; Yang et al., 2022).

$$CUHII = T_{USs} - T_{RSs} \quad (1)$$

In above equation, CUHII is the canopy urban heat island intensity during the summertime,  $T_{USs}$  is the air temperature of the USs, and  $T_{RSs}$  is the summer air temperature of the RSs (Ren et al., 2007; Yang et al., 2022).

In addition, I have attached the information of all selected USs and RSs in the YRDUA region as Table R1, including station names, station numbers, provinces, longitudes, and latitudes. Additionally, I have noticed and corrected the typographical error regarding the number of USs and RSs, which are actually 46 and 25. I apologize for the mistake and have double-checked the text to prevent such errors from occurring again.

**Tab. R1 The information of USs and RSs in YRDUA**

| Station numbers | Types | Provinces | Station names | Longitudes | Latitudes |
|-----------------|-------|-----------|---------------|------------|-----------|
| 58236           | US    | Anhui     | Chuzhou       | 118.2500   | 32.3500   |
| 58238           | US    | Jiangsu   | Nanjing       | 118.9000   | 31.9300   |
| 58241           | US    | Jiangsu   | Gaoyou        | 119.4481   | 32.7919   |
| 58242           | US    | Jiangsu   | Yizheng       | 119.1586   | 32.2997   |
| 58245           | US    | Jiangsu   | Yangzhou      | 119.4200   | 32.4100   |
| 58247           | US    | Jiangsu   | Yangzhong     | 119.7983   | 32.2744   |
| 58250           | US    | Jiangsu   | Jiangyan      | 120.1500   | 32.5200   |
| 58252           | US    | Jiangsu   | Dantu         | 119.4667   | 32.1833   |
| 58254           | US    | Jiangsu   | Haian         | 120.4125   | 32.5486   |
| 58255           | US    | Jiangsu   | Rugao         | 120.5675   | 32.3675   |
| 58257           | US    | Jiangsu   | Jinjiang      | 120.2500   | 31.9800   |

|       |    |          |           |          |         |
|-------|----|----------|-----------|----------|---------|
| 58321 | US | Anhui    | Hefei     | 117.0572 | 31.9556 |
| 58334 | US | Anhui    | Wuhu      | 118.3700 | 31.3800 |
| 58336 | US | Anhui    | Maanshan  | 118.5667 | 31.7000 |
| 58343 | US | Jiangsu  | Changzhou | 119.9781 | 31.8667 |
| 58349 | US | Jiangsu  | Suzhou    | 120.5600 | 31.4100 |
| 58351 | US | Jiangsu  | Jiangyin  | 120.3000 | 31.9000 |
| 58352 | US | Jiangsu  | Changshu  | 120.7667 | 31.6500 |
| 58354 | US | Jiangsu  | Wuxi      | 120.3500 | 31.6167 |
| 58356 | US | Jiangsu  | Kunshan   | 121.0000 | 31.4000 |
| 58359 | US | Jiangsu  | Wujiang   | 120.6167 | 31.1333 |
| 58361 | US | Shanghai | Minhang   | 121.3667 | 31.1000 |
| 58362 | US | Shanghai | Baoshan   | 121.4447 | 31.3908 |
| 58365 | US | Shanghai | Jiading   | 121.1994 | 31.3806 |
| 58367 | US | Shanghai | Xujiahui  | 121.4300 | 31.2000 |
| 58370 | US | Shanghai | Pudong    | 121.5300 | 31.2300 |
| 58443 | US | Zhejiang | Changxing | 119.8900 | 31.0200 |
| 58449 | US | Zhejiang | Fuyang    | 119.9500 | 30.0500 |
| 58451 | US | Zhejiang | Jiashan   | 120.9300 | 30.8300 |
| 58452 | US | Zhejiang | Jiaxing   | 120.7667 | 30.7333 |
| 58457 | US | Zhejiang | Hangzhou  | 120.1600 | 30.2300 |
| 58459 | US | Zhejiang | Xiaoshan  | 120.2800 | 30.1800 |
| 58460 | US | Shanghai | Jinshan   | 121.2667 | 30.8167 |
| 58461 | US | Shanghai | Qingpu    | 121.1167 | 31.1333 |
| 58462 | US | Shanghai | Songjiang | 121.1758 | 31.0200 |
| 58467 | US | Zhejiang | Cixi      | 121.2700 | 30.2000 |
| 58468 | US | Zhejiang | Yuyao     | 121.1300 | 30.0200 |
| 58561 | US | Zhejiang | Zhenhai   | 121.6000 | 29.9800 |
| 58562 | US | Zhejiang | Yinzhou   | 121.5000 | 29.8000 |
| 58665 | US | Zhejiang | Hongjia   | 121.4167 | 28.6167 |
| 58203 | US | Anhui    | Fuyang    | 115.7364 | 32.8775 |
| 58424 | US | Anhui    | Anqing    | 116.9672 | 30.6231 |
| 58141 | US | Jiangsu  | Huaian    | 118.9269 | 33.6378 |
| 58027 | US | Jiangsu  | Xuzhou    | 117.1586 | 34.2872 |
| 58549 | US | Zhejiang | Jinhua    | 119.6558 | 29.1128 |
| 58659 | US | Zhejiang | Wenzhou   | 120.6578 | 28.0250 |
| 58223 | RS | Anhui    | Mingguang | 117.9892 | 32.8003 |
| 58340 | RS | Jiangsu  | Lishui    | 119.0639 | 31.6028 |
| 58107 | RS | Anhui    | Linquan   | 115.2611 | 32.9106 |
| 58235 | RS | Jiangsu  | Liuhe     | 118.8472 | 32.3686 |
| 58264 | RS | Jiangsu  | Rudong    | 121.2206 | 32.3422 |
| 58342 | RS | Jiangsu  | Jintan    | 119.5406 | 31.7103 |
| 58243 | RS | Jiangsu  | Xinghua   | 119.8172 | 32.9458 |
| 58337 | RS | Anhui    | Fanchang  | 118.2153 | 31.0558 |
| 58335 | RS | Anhui    | Dangtu    | 118.5544 | 31.5531 |

|       |    |          |              |          |         |
|-------|----|----------|--------------|----------|---------|
| 58339 | RS | Jiangsu  | Gaochun      | 118.9039 | 31.3333 |
| 58377 | RS | Jiangsu  | Taicang      | 121.1075 | 31.5136 |
| 58353 | RS | Jiangsu  | Zhangjiagang | 120.5697 | 31.8586 |
| 58455 | RS | Zhejiang | Haining      | 120.4919 | 30.4792 |
| 58553 | RS | Zhejiang | Shangyu      | 120.8133 | 30.0533 |
| 58541 | RS | Zhejiang | Linan        | 119.7522 | 30.2969 |
| 58420 | RS | Anhui    | Zongyang     | 117.2331 | 30.7125 |
| 58565 | RS | Zhejiang | Fenghua      | 121.3869 | 29.6917 |
| 58454 | RS | Zhejiang | Deqing       | 119.9839 | 30.5253 |
| 58559 | RS | Zhejiang | Tiantai      | 120.9706 | 29.1528 |
| 58320 | RS | Anhui    | Feixi        | 117.0303 | 31.6081 |
| 58366 | RS | Shanghai | Chongming    | 121.4928 | 31.6664 |
| 58038 | RS | Jiangsu  | Shuyang      | 118.7836 | 34.0911 |
| 58012 | RS | Jiangsu  | Fengxian     | 116.6561 | 34.6719 |
| 58546 | RS | Zhejiang | Pujiang      | 119.8722 | 29.4750 |
| 58751 | RS | Zhejiang | Pingyang     | 120.5731 | 27.6686 |

**Reference:**

- Ren, G., Chu, Z., Chen, Z., Ren, Y.: Implications of temporal change in urban heat island intensity observed at Beijing and Wuhan stations. *Geophysical Research Letters*, 34, 5, <https://doi.org/10.1029/2006GL027927>, 2007.
- Yang, Y., Guo, M., Ren, G., Liu, S., Zong, L., Zhang, Y., et al. Modulation of wintertime canopy urban heat island (CUHI) intensity in Beijing by synoptic weather pattern in planetary boundary layer. *Journal of Geophysical Research: Atmospheres*, 127, e2021JD035988. <https://doi.org/10.1029/2021JD035988>, 2022.
